# Supplementary material
Source: publisher figshare collection journal article supplement (https://acs.figshare.com/ndownloader/files/5805786)
Supplement: Supplementary file 1 [file 5805786]

#### Terms & Conditions

Electronic Supporting Information files are available without a subscription to ACS Web Editions. The American Chemical Society holds a copyright ownership interest in any copyrightable Supporting Information. Files available from the ACS website may be downloaded for personal use only. Users are not otherwise permitted to reproduce, republish, redistribute, or sell any Supporting Information from the ACS website, either in whole or in part, in either machine-readable form or any other form without permission from the American Chemical Society. For permission to reproduce, republish and redistribute this material, requesters must process their own requests via the RightsLink permission system. Information about how to use the RightsLink permission system can be found at <http://pubs.acs.org/page/copyright/permissions.html>

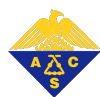

ACS Publications

MOST TRUSTED. MOST CITED. MOST READ.

Copyright © 1998 American Chemical Society

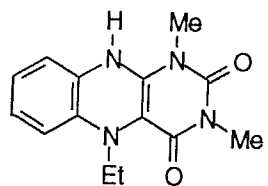

3

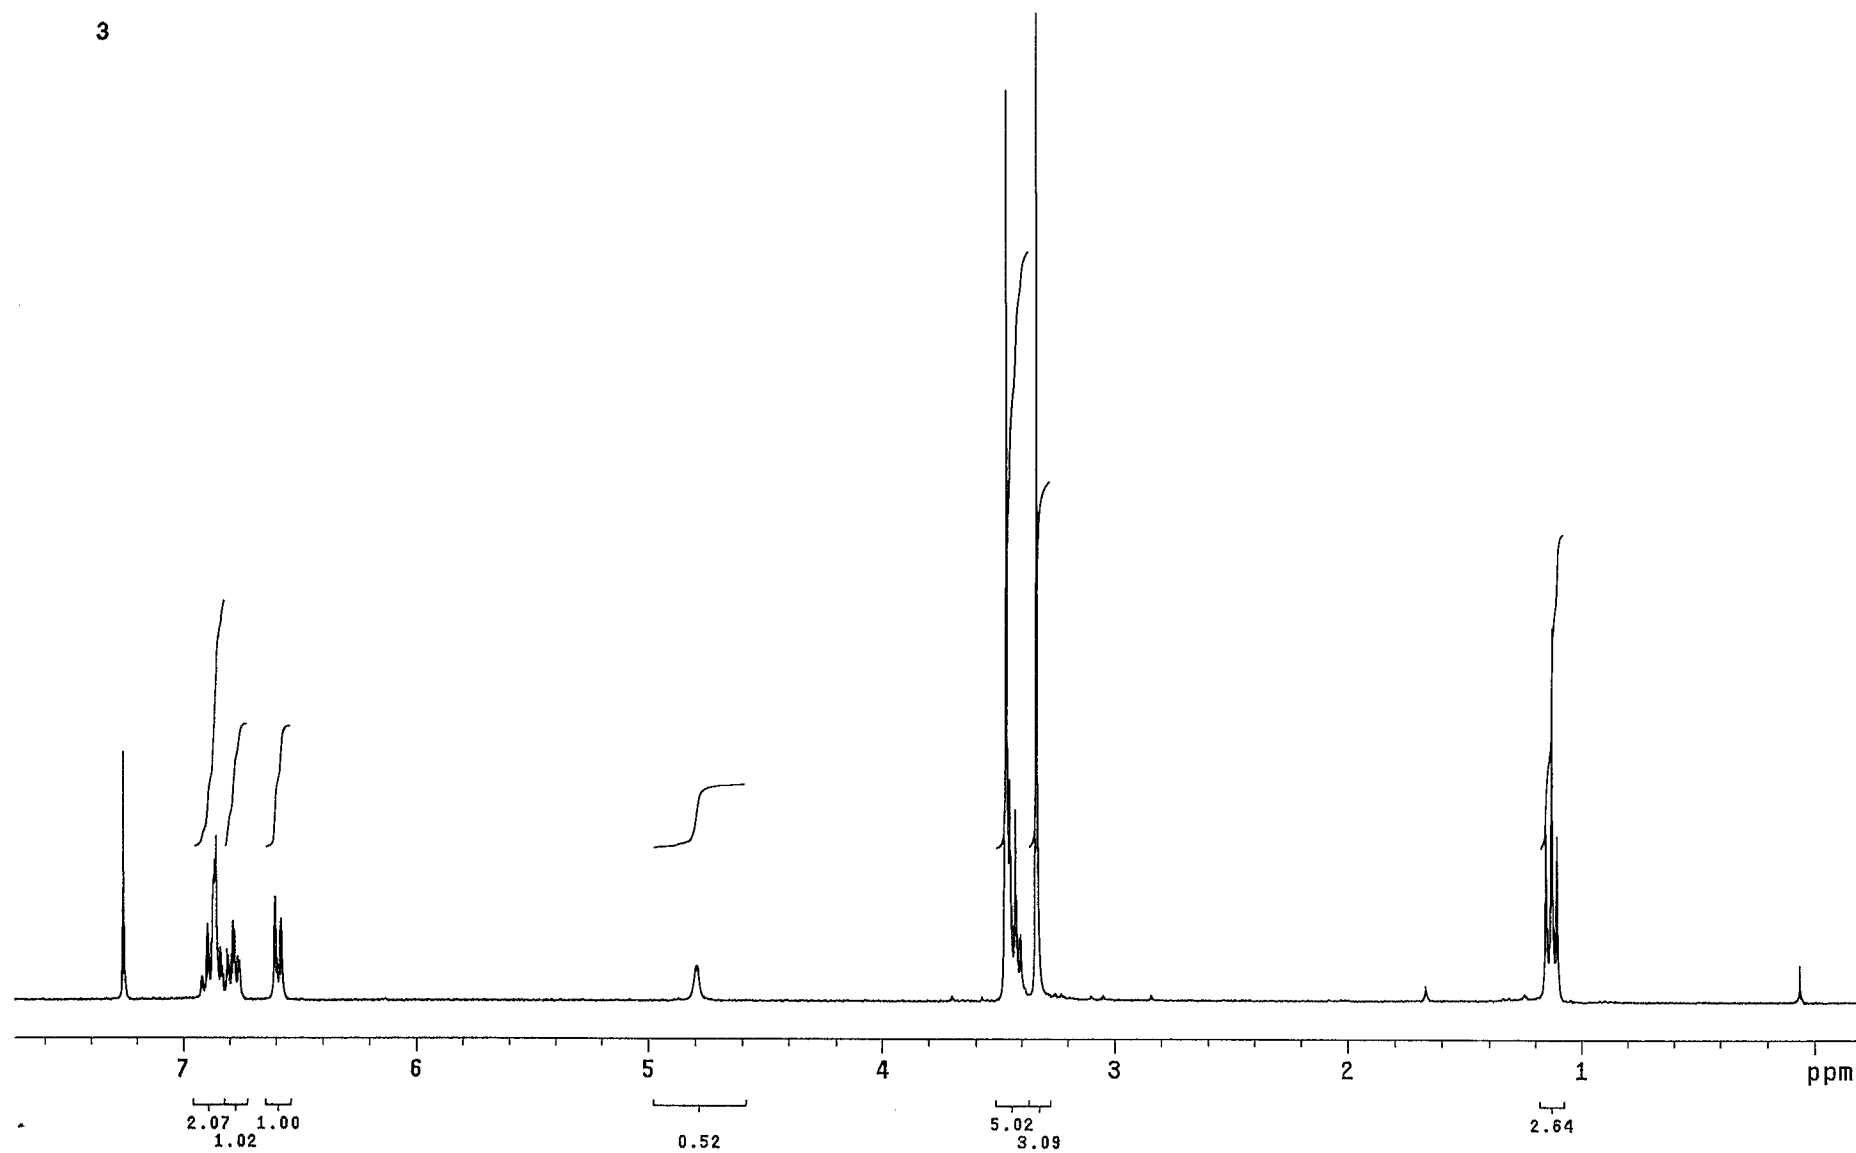

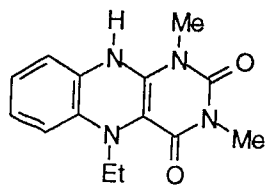

3

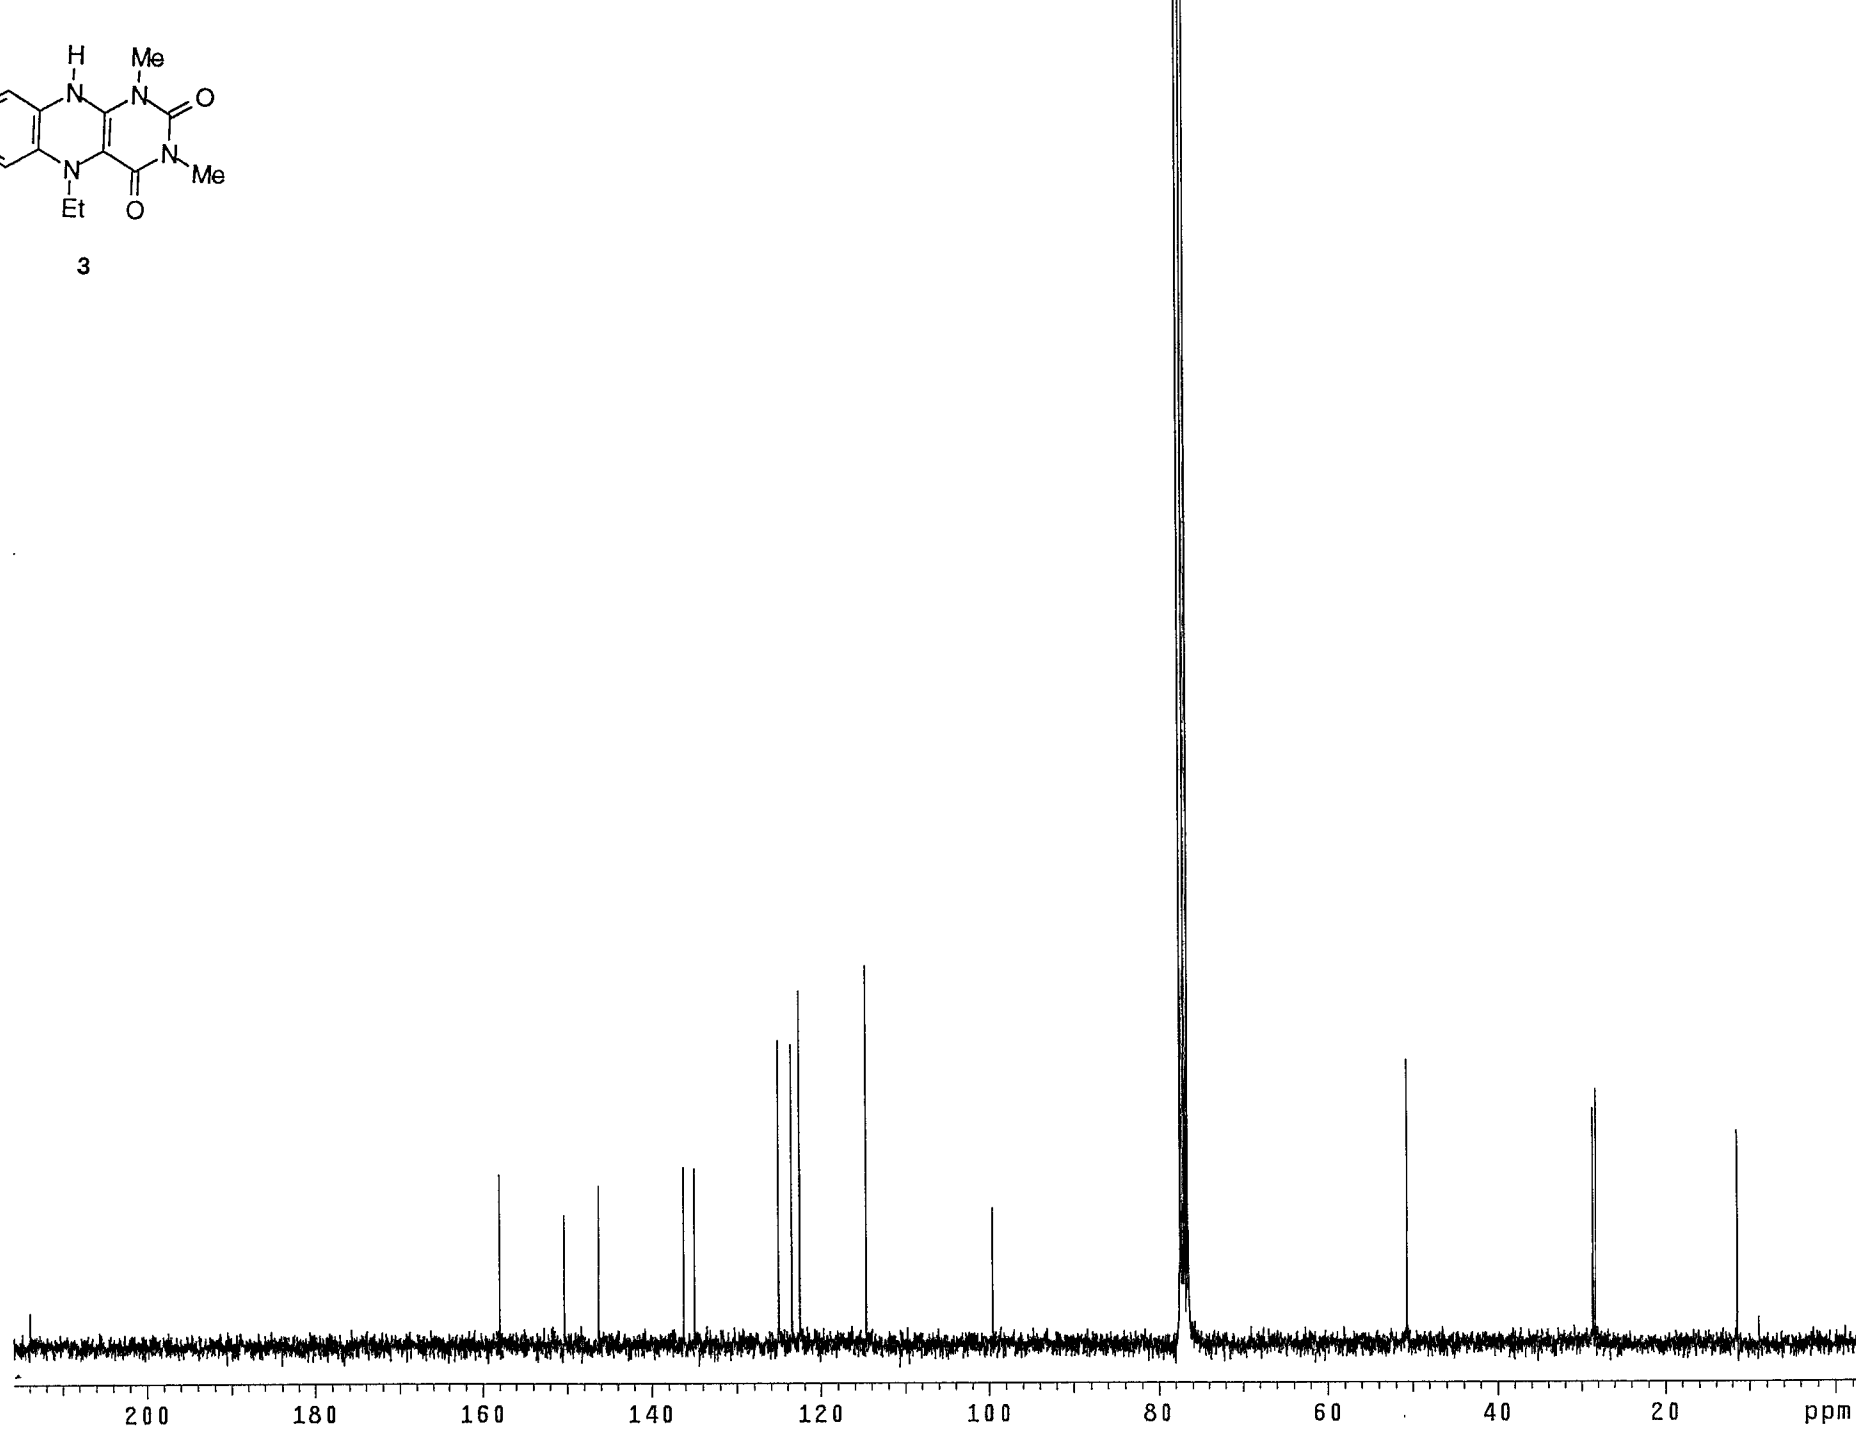

**General Procedure for Preparation of Tertiary Amines.** **N,N-Dimethylbenzylamine (15).** A mixture of benzylbromide (3.50 mL, 29.4 mmol) and dimethylamine (19 mL of a 40% aqueous solution, 150 mmol) in EtOH (39 mL) were refluxed for 1 h 15 min. After acidification of the solution to pH 1 with concentrated HCl, most of the solvents were evaporated. 2M NaOH was added to the resulting oil until the pH was 14. The phases were separated, and the aqueous phase was extracted with ether. The combined organic phases were washed with saturated aqueous NaCl and dried (MgSO<sub>4</sub>). Concentration under reduced pressure followed by distillation of the crude product (3.47 g) yielded **15** as a colorless oil (2.76 g, 69%) (bp 35-37 °C/4 mmHg). The <sup>1</sup>H and <sup>13</sup>C NMR spectra of the product were in accordance with those previously reported.<sup>1</sup>

**N,N-Dimethyldodecylamine (9).** Dodecylbromide (10.0 g, 40.1 mmol) and dimethylamine (26 mL of a 40% aqueous solution, 206 mmol) in EtOH were refluxed for 1 h 30 min. **9** was obtained as a colorless oil (5.43 g, 63%) (bp 104-106 °C/4 mmHg). The <sup>1</sup>H and <sup>13</sup>C NMR spectra of the product were identical to data reported in the literature.<sup>2, 3</sup>

**N,N-Dimethyl-2-Octylamine (11).** 2-Octylbromide (2.0 g, 10.4 mmol) and dimethylamine (7.1 mL of a 40% aqueous solution, 56 mmol) in EtOH were refluxed for 4 h. **11** was obtained as a colorless oil (1.02 g, 62%) (bp 46-48 °C/4 mmHg). <sup>1</sup>H NMR<sup>4</sup> (CDCl<sub>3</sub>, 400 MHz) δ 2.45 (tq, 1H, *J*= 1.3, 6.5 Hz), 2.21 (s, 6H), 1.48 (m, 1H), 1.38-1.16 (br s, 9H), 0.93 (d, 3H, *J*= 6.5 Hz), 0.89 (t, 3H, *J*= 6.9 Hz). <sup>13</sup>C NMR (CDCl<sub>3</sub>, 100.6 MHz) δ 59.1, 40.6, 33.5, 31.9, 29.6, 26.8, 22.7, 14.1, 13.6.

**N,N-Dimethylcycloheptylamine (17).** Cycloheptylbromide (5.02 g, 28.3 mmol) and dimethylamine (18 mL of a 40% aqueous solution, 142 mmol) in EtOH were refluxed for 4 h 30 min. **17** was obtained as a colorless oil (2.10 g, 52%) (bp 40-41 °C/4 mmHg). The <sup>1</sup>H and <sup>13</sup>C NMR spectra of the product were identical to data reported in the literature.<sup>5, 6</sup>

**N,N-Dimethyl-2-Octylamine N-Oxide (12).**  $^1\text{H}$  NMR ( $\text{MeOH-d}_4$ , 400 MHz)  $\delta$  3.20 (m, 1H), 3.08 (s, 3H), 3.06 (s, 3H), 2.14 (m, 1H), 1.51-1.17 (d ( $J=6.7$  Hz) overlapped by m, 12H), 0.89 (t, 3H,  $J=6.8\text{Hz}$ ).  $^{13}\text{C}$  NMR ( $\text{MeOH-d}_4$ , 100.6 MHz)  $\delta$  76.6, 55.6, 54.5, 32.7, 31.7, 30.1, 28.0, 23.5, 14.9, 14.3.

**N,N-Dimethylcyclohexylmethylaniline N-Oxide (14).**  $^1\text{H}$  NMR ( $\text{CDCl}_3$ , 400 MHz)  $\delta$  3.16 (s, 6H), 3.10 (d, 2H,  $J=4.6$  Hz), 2.03 (tt, 1H,  $J=4.0, 11.2$  Hz), 1.92 (br d, 2H,  $J=12.8$  Hz), 1.75-1.58 (m, 3H), 1.34 (tq, 2H,  $J=3.3, 12.5$  Hz), 1.22-1.03 (m, 3H)  $^{13}\text{C}$  NMR ( $\text{CDCl}_3$ , 100.6 MHz)  $\delta$  78.0, 58.9, 33.1, 33.0, 25.5, 25.3.

**N,N-Dimethylcycloheptylamine N-Oxide (18).**  $^1\text{H}$  NMR ( $\text{CDCl}_3$ , 400 MHz)  $\delta$  3.18 (tt, 1H,  $J=3.8, 9.7$  Hz), 3.06 (s, 6H), 2.46 (m, 2H), 1.78 (m, 2H), 1.67-1.46 (m, 8H).  $^{13}\text{C}$  NMR ( $\text{CDCl}_3$ , 100.6 MHz)  $\delta$  80.4, 54.7, 28.3, 27.2, 24.8.

**Oxidation of N-Methylmorpholine (7):**

| Time<br>(min) | Conversion<br>(%) |
|---------------|-------------------|
| 0             | 0                 |
| 5             | 14                |
| 10            | 28                |
| 15            | 37                |
| 20            | 50                |
| 26            | 55                |
| 30            | 59                |
| 36            | 65                |
| 45            | 71                |
| 55            | 77                |
| 65            | 81                |

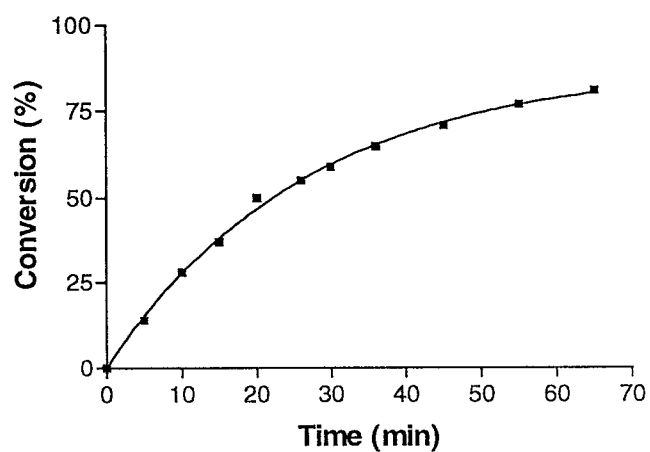**Oxidation of N,N-Dimethyldodecylamine (9):**

| Time<br>(min) | Conversion<br>(%) |
|---------------|-------------------|
| 0             | 0                 |
| 5             | 26                |
| 10            | 44                |
| 15            | 59                |
| 20            | 71                |
| 25            | 80                |
| 30            | 86                |
| 36            | 90                |
| 45            | 95                |
| 62            | 98                |
| 73            | 100               |

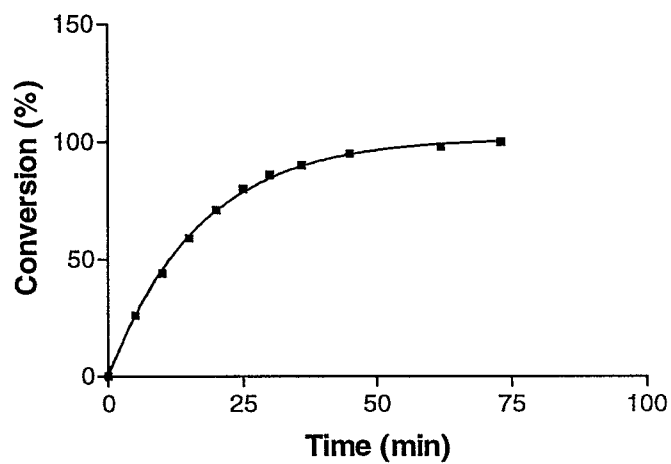

**Oxidation of N,N-Dimethyl-2-Octylamine (11):**

| Time<br>(min) | Conversion<br>(%) |
|---------------|-------------------|
| 0             | 0                 |
| 5             | 33                |
| 10            | 55                |
| 16            | 72                |
| 20            | 80                |
| 25            | 86                |
| 30            | 88                |
| 35            | 92                |

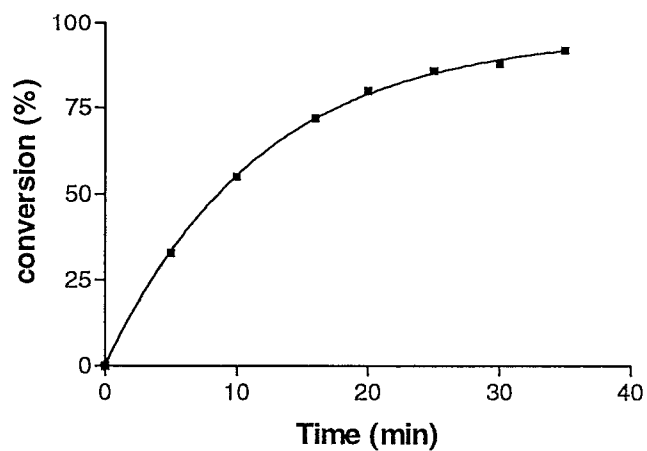

**Oxidation of N,N-Dimethylcyclohexylmethylamine (13):**

| Time<br>(min) | Conversion<br>(%) |
|---------------|-------------------|
| 0             | 0                 |
| 5             | 17                |
| 10            | 31                |
| 15            | 45                |
| 20            | 54                |
| 25            | 62                |
| 30            | 68                |
| 35            | 74                |
| 46            | 82                |
| 56            | 86                |

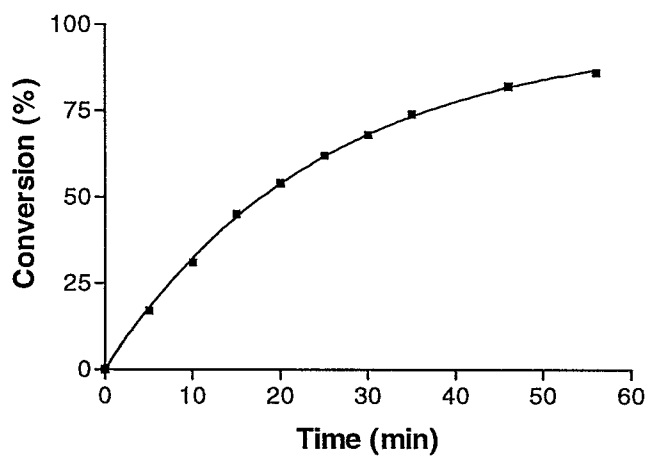

**Oxidation of N,N-Dimethylbenzylamine (15):**

| Time<br>(min) | Conversion<br>(%) |
|---------------|-------------------|
| 0             | 0                 |
| 5             | 27                |
| 10            | 45                |
| 15            | 61                |
| 20            | 72                |
| 25            | 79                |
| 30            | 84                |
| 35            | 89                |
| 45            | 94                |
| 55            | 96                |

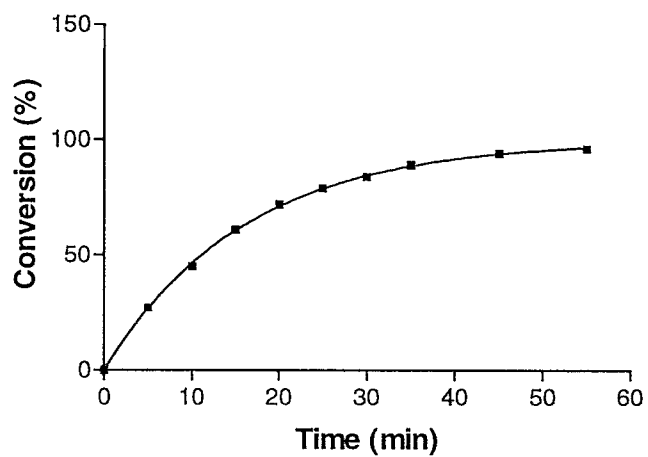**Oxidation of N,N-Dimethylcycloheptylamine (17):**

| Time<br>(min) | Conversion<br>(%) |
|---------------|-------------------|
| 0             | 0                 |
| 5             | 28                |
| 10            | 44                |
| 15            | 59                |
| 20            | 69                |
| 25            | 77                |
| 30            | 85                |
| 35            | 88                |
| 46            | 92                |
| 59            | 97                |

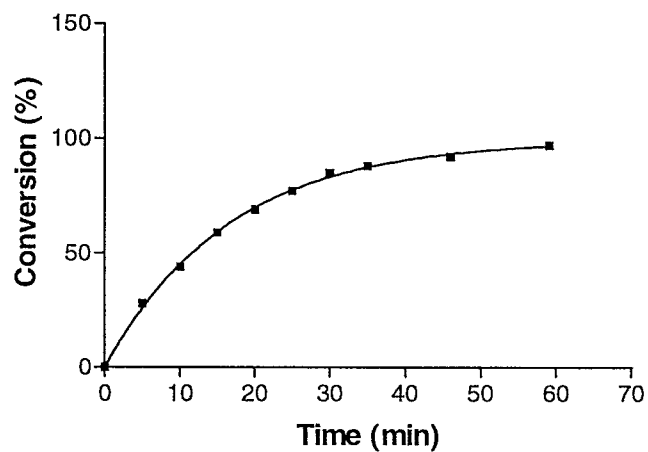



**Oxidation of N-Methylpiperidine (19):**

| Time<br>(min) | Conversion<br>(%) |
|---------------|-------------------|
| 0             | 0                 |
| 5             | 21                |
| 11            | 35                |
| 15            | 45                |
| 20            | 53                |
| 25            | 62                |
| 30            | 67                |
| 35            | 73                |
| 45            | 80                |
| 55            | 85                |
| 65            | 89                |

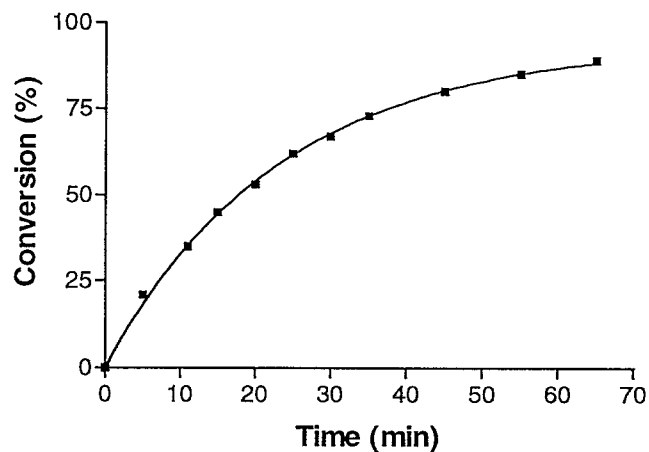**Oxidation of Triethylamine (21):**

| Time<br>(min) | Conversion<br>(%) |
|---------------|-------------------|
| 0             | 0                 |
| 5             | 18                |
| 10            | 34                |
| 15            | 46                |
| 20            | 55                |
| 25            | 62                |
| 30            | 68                |
| 36            | 74                |
| 44            | 80                |
| 57            | 87                |

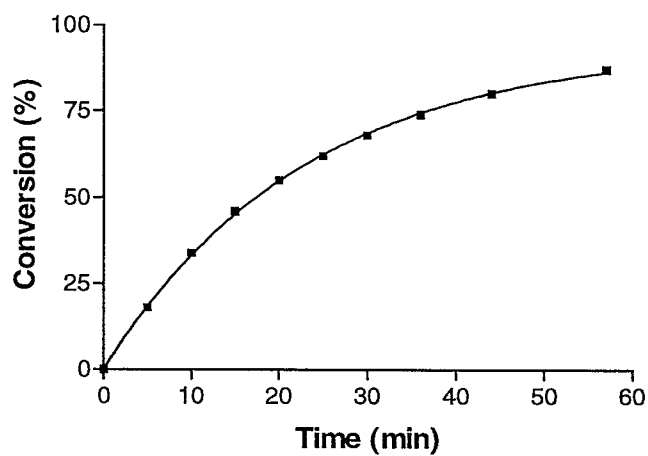

1. Kaur, R.; Singh, H.B.; Patel, R.P. *J. Chem. Soc., Dalton Trans.* **1996**, 2719.
2. Seeman, J.I.; Bassfield, R.L. *J. Org. Chem.* **1977**, 42, 2337.
3. Brycki, B.; Szafran, M. *Magn. Reson. Chem.* **1992**, 30, 535.
4. de Vries, J.G.; Kellogg, R.M. *J. Org. Chem.* **1980**, 45, 4126.
5. Bhattacharyya, S. *J. Org. Chem.* **1995**, 60, 4928.
6. Krajnik, P.; Michos, D.; Crabtree, R.H. *New. J. Chem.* **1993**, 17, 805.
